# Supplementary material for: Pan‐Cancer Analysis Predicts the Immunological and Prognostic Role of ZC3H12C in KIRC
Source: Hindawi journal article supplement (doi:10.1155/2022/4541571), 2022-01-01

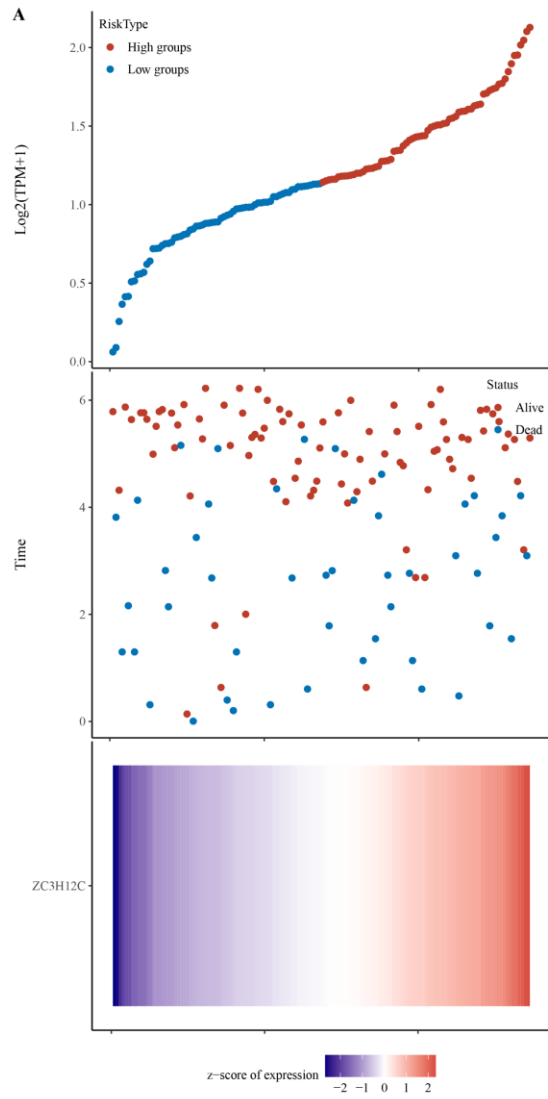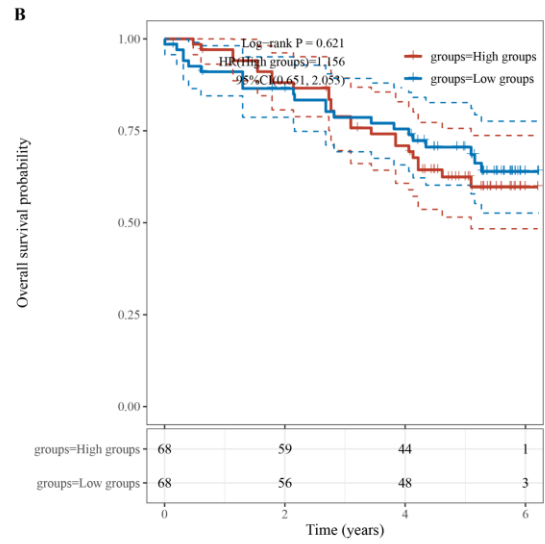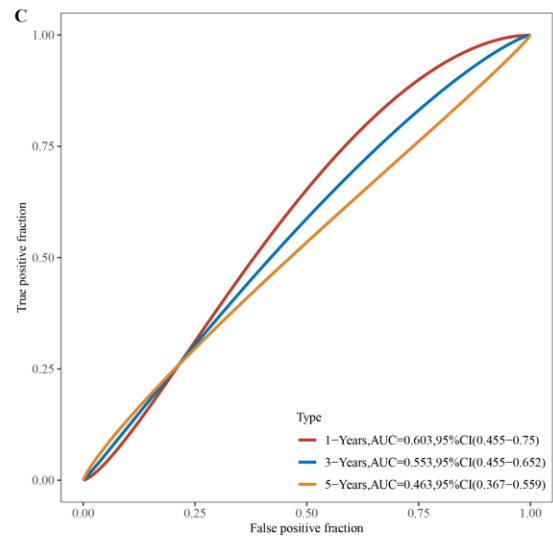

Supplement: f1 [file 4541571.f1.pdf]
